# Supplementary material for: Folding behavior of a T-shaped, ribosome-binding translation enhancer implicated in a wide-spread conformational switch
Source: eLife journal article supplement (doi:10.7554/elife.22883), 2017-02-10
Supplement: supp [file elife-22883-supp-v2.zip]

Archive with 8 entries (8 files):
- elife_poa_e22883_Figure_4_figure_supplement_1.pdf
- elife_poa_e22883_Video_1.mp4
- elife_poa_e22883_Figure_2_figure_Supplement_1.pdf
- elife_poa_e22883_Figure_8_figure_supplement_1.pdf
- elife_poa_e22883_Figure_3_figure_supplement_1.pdf
- elife_poa_e22883_Figure_3_figure_supplement_2.pdf
- elife_poa_e22883_Figure_2_figure_supplement_2.pdf
- elife_poa_e22883_Figure_1_Figure_Supplement_1.pdf
