# Supplementary figures and images for: Folding behavior of a T-shaped, ribosome-binding translation enhancer implicated in a wide-spread conformational switch
Source: eLife journal article supplement (doi:10.7554/elife.22883), 2017-02-10

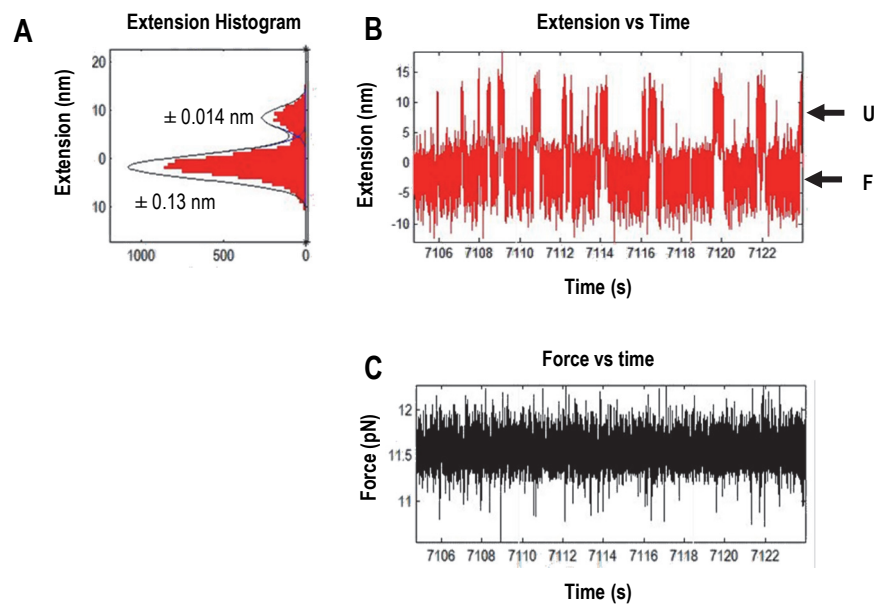

Figure 4-Figure supplement 1

Supplement: supp [file elife-22883-supp-v1.zip › elife_poa_e22883_Figure_4_figure_supplement_1.pdf]

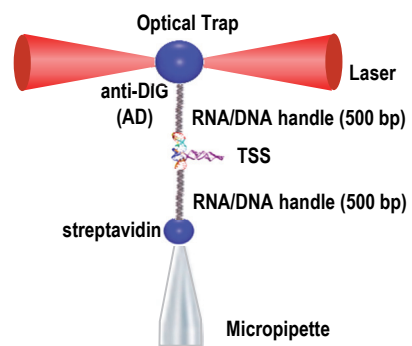

Figure 2-Figure supplement 1

Supplement: supp [file elife-22883-supp-v1.zip › elife_poa_e22883_Figure_2_figure_Supplement_1.pdf]

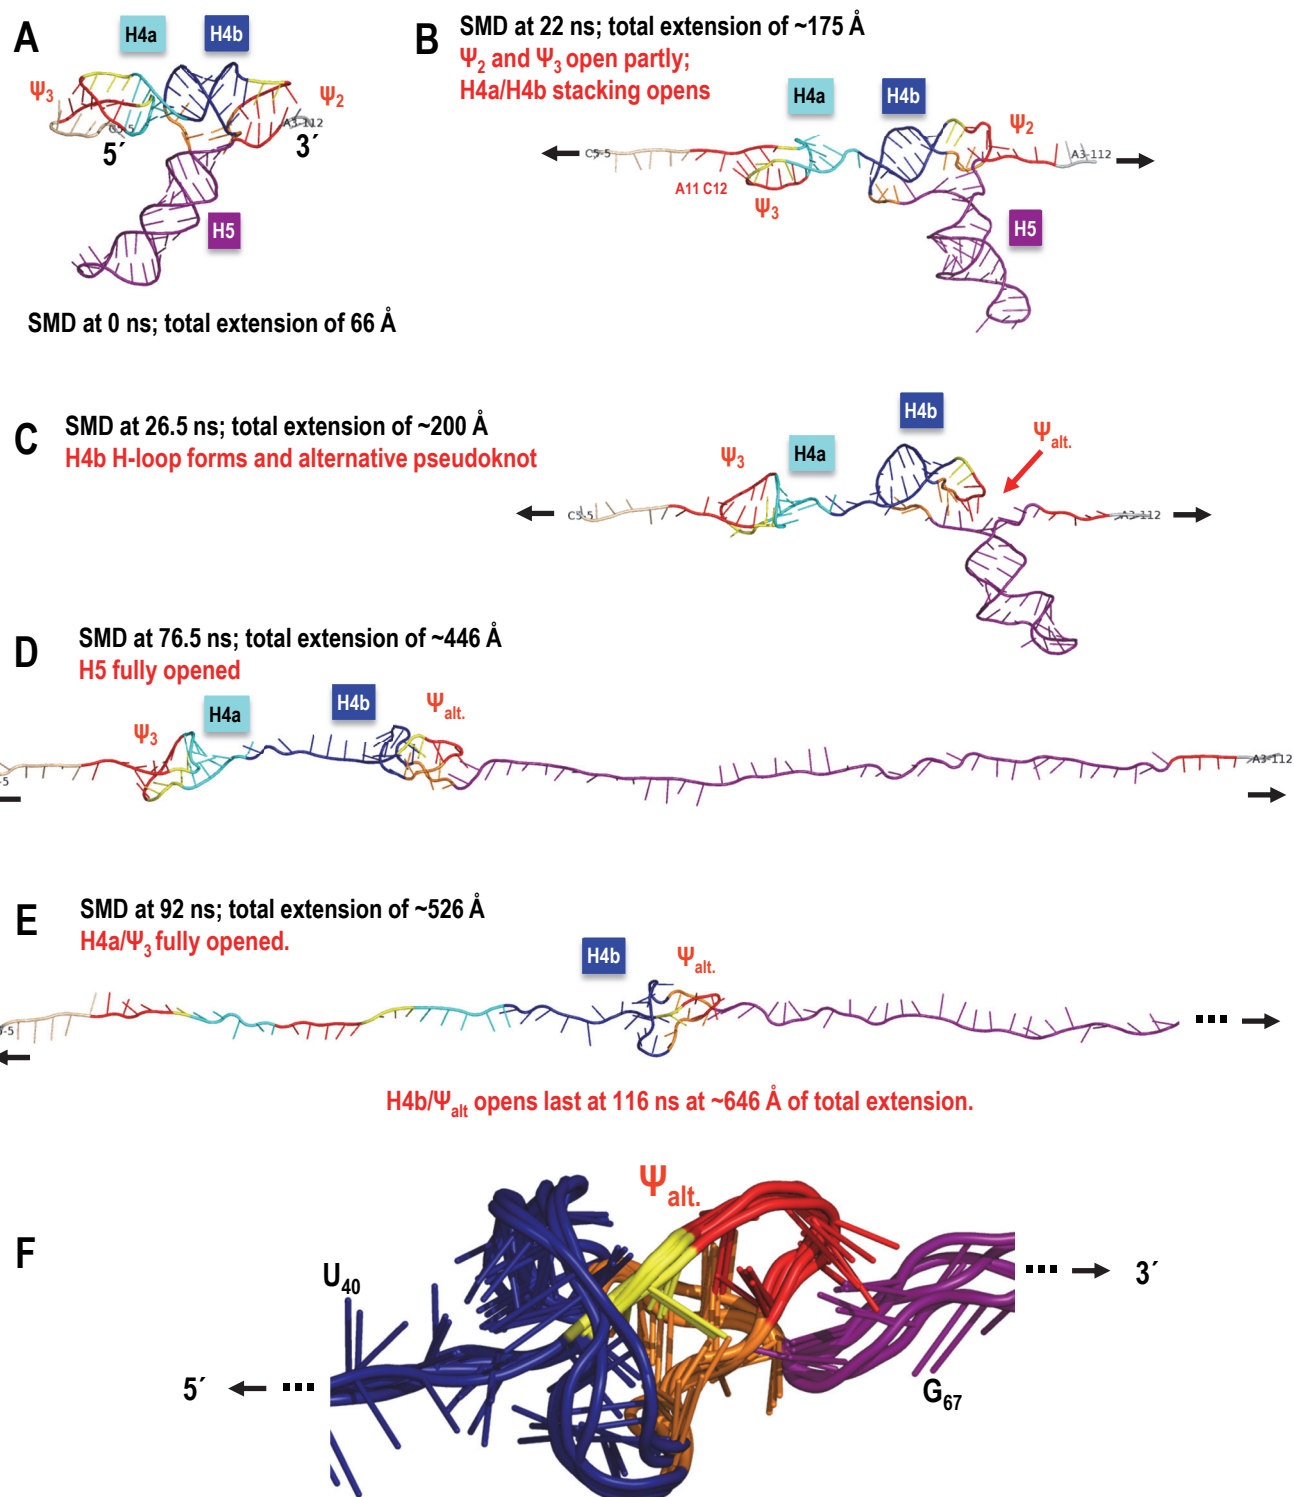

Figure 8-Figure supplement 1

Supplement: supp [file elife-22883-supp-v1.zip › elife_poa_e22883_Figure_8_figure_supplement_1.pdf]

**A**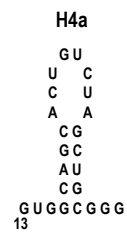**B**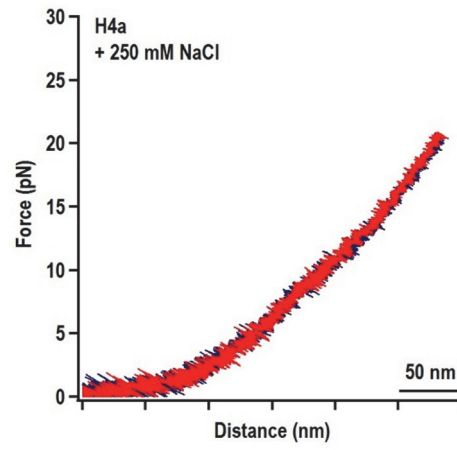

Supplement: supp [file elife-22883-supp-v1.zip › elife_poa_e22883_Figure_3_figure_supplement_1.pdf]

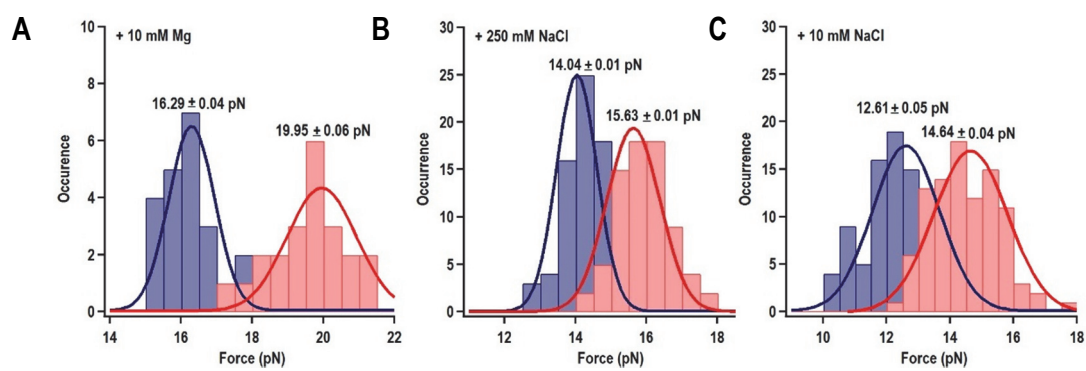

Figure 3-Figure supplement 2

Supplement: supp [file elife-22883-supp-v1.zip › elife_poa_e22883_Figure_3_figure_supplement_2.pdf]

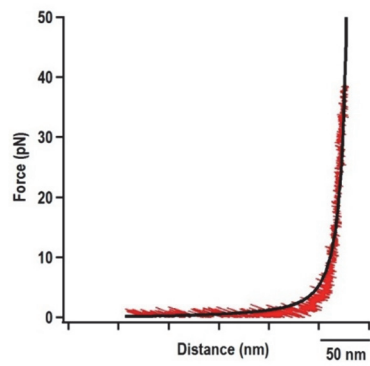

Figure 2-Figure supplement 2

Supplement: supp [file elife-22883-supp-v1.zip › elife_poa_e22883_Figure_2_figure_supplement_2.pdf]

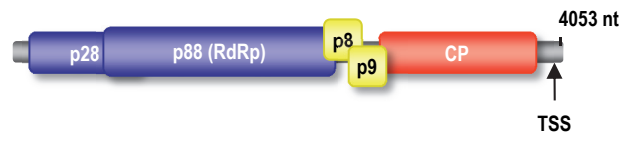

Figure 1-Figure supplement 1

Supplement: supp [file elife-22883-supp-v1.zip › elife_poa_e22883_Figure_1_Figure_Supplement_1.pdf]
